# Supplementary material for: A single site catalyst supported in mesoporous UiO-66 for catalytic conversion of carbon dioxide to formate
Source: Royal Society of Chemistry journal article supplement (doi:10.1039/d3se01465g), 2024-01-01
Supplement: d3se01465g1.pdf [file d3se01465g1.pdf]

## Single Site Catalyst Supported in Mesoporous UiO-66 for Catalytic Conversion of Carbon Dioxide to Formate

Maureen Gumbo,<sup>a,b</sup> Edward Ocansey,<sup>b</sup> Banothile C.E. Makhubela,<sup>b</sup> Francoise M. Amombo Noa,<sup>c</sup> Lars Öhrström,<sup>c</sup> Obieda S. Mudraj,<sup>d</sup> and Gift Mehlana<sup>\*,a</sup>

<sup>a</sup>Department of Chemical Sciences, Faculty of Science and Technology, Midlands State University, Private Bag 9055, Senga Road, Gweru, Zimbabwe

<sup>b</sup>Research Centre for Synthesis and Catalysis, Department of Chemical Sciences, University of Johannesburg, Auckland Park Kingsway Campus, Auckland Park, 2006, South Africa

<sup>c</sup>Chalmers University of Technology, Department of Chemistry and Chemical Engineering, SE-412 96, Göteborg, Sweden

<sup>d</sup>Materials Discovery Research Unit, Advanced Research Centre, Royal Scientific Society, Amman 11941, Jordan

E-mail: [mehlanag@staff.msu.ac.zw](mailto:mehlanag@staff.msu.ac.zw)

### Estimated defects calculation.

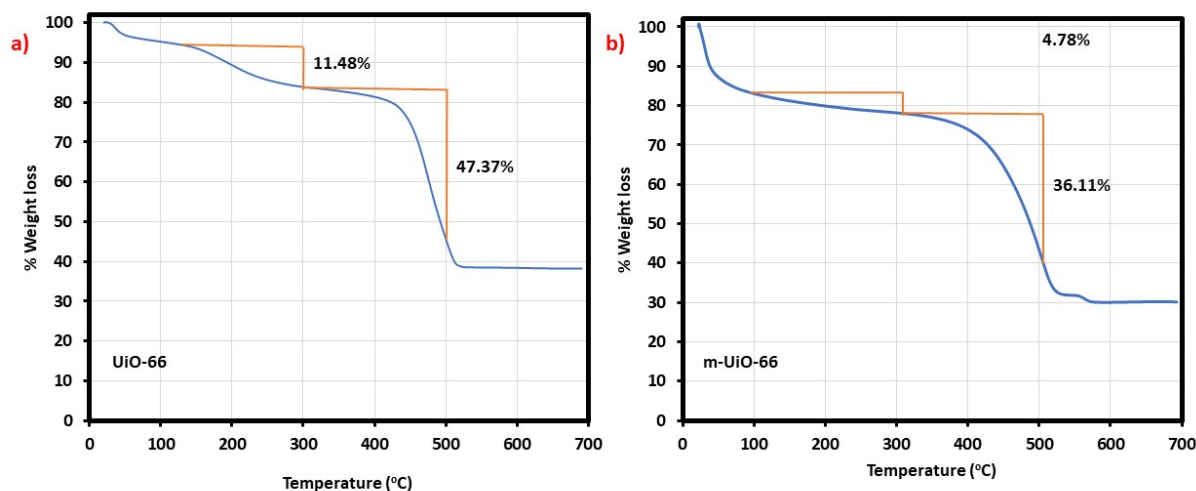

**Figure S1.** TGA analysis of, (a) Pristine UiO-66, and (b) Mesoporous m-UiO-66 in defects calculations.

Thermal decomposition of UiO-66,  $Zr_6O_4(OH)_4(BDC)_6$  results in the loss of volatile substances and the organic linkers to yield  $ZrO_2$ . Pristine UiO-66 showed larger weight loss after 400 °C as compared to defective m-UiO-66. Weight loss below 100 °C was attributed to moisture and was not included in the calculation. The total weight loss in wt.% between 100 °C (linker-containing

phase) and 500 °C (ligands are decomposed) were 50.87% and 40.89% for pristine UiO-66 and mesoporous m-UiO-66 respectively.

Molecular weight of pristine UiO-66,  $(Zr_6O_4(OH)_4(BDC)_6) = 1664.04 \text{ gmol}^{-1}$

Molecular weight of  $(ZrO_2)_6 = 739.32 \text{ gmol}^{-1}$

Expected % weight loss of linkers in pristine UiO-66 =  $(1664.04 - 739.32)/1664.04 = 55.6\%$

Experimental % weight loss of linkers in pristine UiO-66:  $(95.24 - 44.37)/95.24 = 53.4\%$

Experimental % weight loss of linkers defective m-UiO-66:  $(82.97 - 42.08)/82.97 = 49.3\%$

The theoretical loss of the linker was calculated as follows:

If UiO-66 lost 1 linker the formula becomes  $Zr_6O_4(OH)_4(BDC)_5$  with molecular weight of  $1499.92 \text{ gmol}^{-1}$

Estimated % weight loss in defective UiO-66 will be;  $(1499.92 - 739.32)/1499.92 = 51.2\%$

Therefore, we can estimate that almost 1 linker in the asymmetric unit is missing in defective m-UiO-66 resulting in hierarchical mesoporous m-UiO-66.

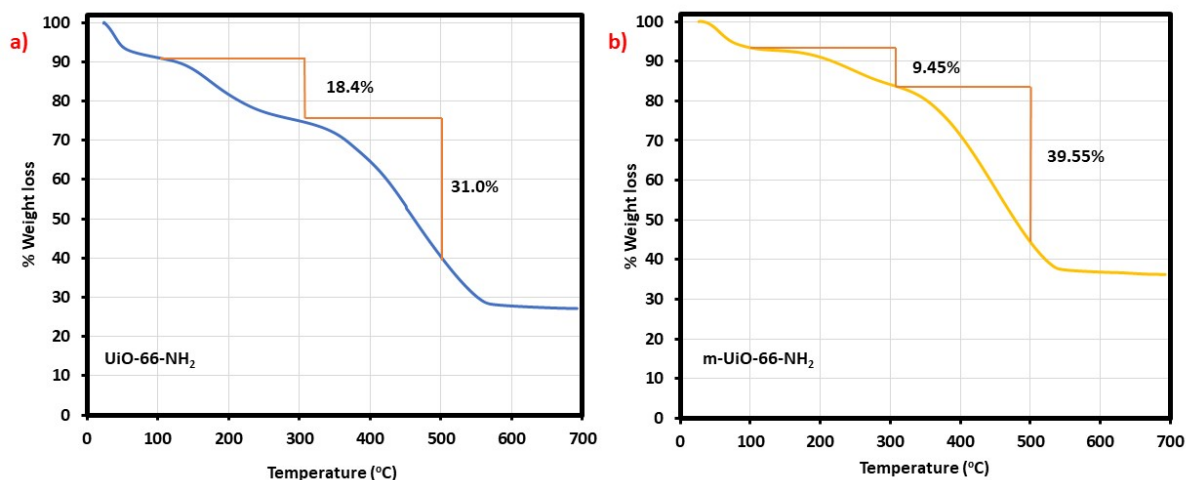

**Figure S2.** TGA analysis of, (a) Pristine UiO-66-NH<sub>2</sub>, and (b) Mesoporous m-UiO-66-NH<sub>2</sub> in defects calculations.

Molecular weight of pristine UiO-66-NH<sub>2</sub>,  $(Zr_6O_4(OH)_4(BDC)_6) = 1754.1 \text{ gmol}^{-1}$

Molecular weight of  $(ZrO_2)_6 = 739.32 \text{ gmol}^{-1}$

Expected % weight loss of linkers in pristine UiO-66-NH<sub>2</sub> =  $(1754.1 - 739.32) / 1754.1 = 57.9\%$   
 Experimental % weight loss of linkers in pristine UiO-66-NH<sub>2</sub>:  $(90.96 - 39.69) / 95.24 = 56.1\%$   
 Experimental % weight loss of linkers defective m-UiO-66-NH<sub>2</sub>:  $(93.36 - 43.96) / 93.36 = 52.9\%$

The theoretical loss of the linker was calculated as follows:

If UiO-66 lost 1 linker the formula becomes Zr<sub>6</sub>O<sub>4</sub>(OH)<sub>4</sub>(BDC-NH<sub>2</sub>)<sub>5</sub> with molecular weight of 1574.97 gmol<sup>-1</sup>

Estimated % weight loss in defective m-UiO-66-NH<sub>2</sub> will be;  $(1574.97 - 739.32) / 1574.97 = 53.1\%$

Therefore, we can estimate that almost 1 linker in the asymmetric unit is missing in defective UiO-66-NH<sub>2</sub> resulting in hierarchical mesoporous m-UiO-66-NH<sub>2</sub>.

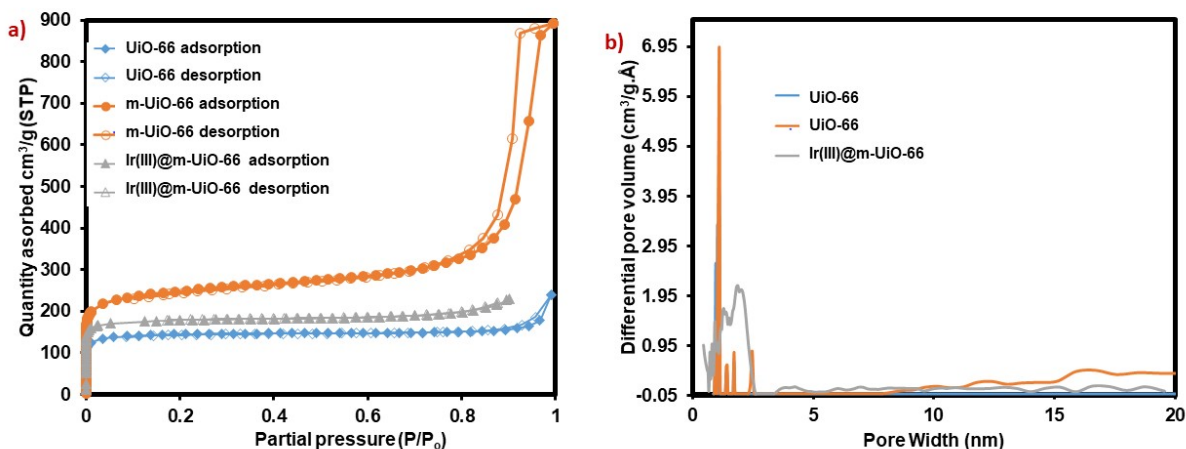

**Figure S3.** (a) Adsorption and desorption of UiO-66 and its derivatives at 77K. (b) Pore size analysis distribution of UiO-66 and its derivatives

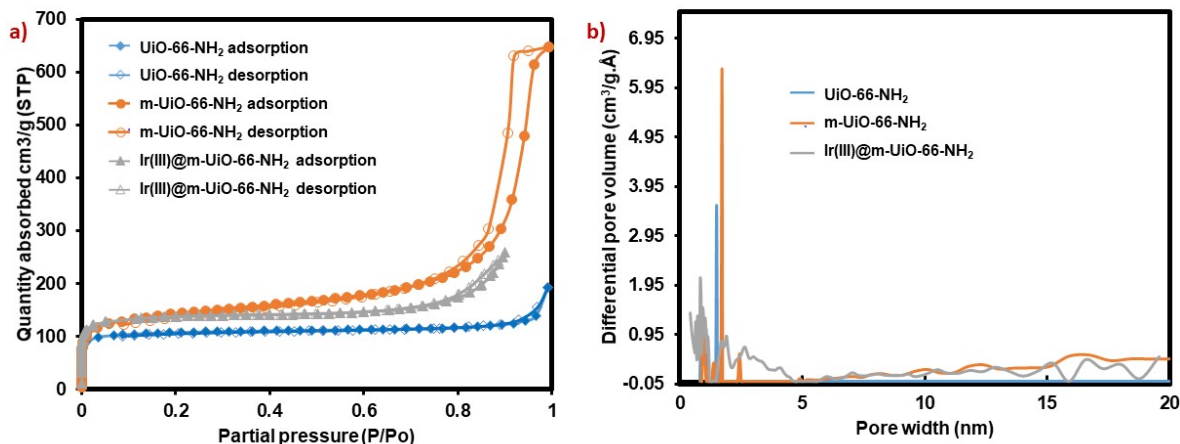

**Figure S4.** (a) Adsorption and desorption UiO-66-NH<sub>2</sub> and its derivatives at 77K. (b) Pore size analysis distribution of UiO-66-NH<sub>2</sub> and its derivatives

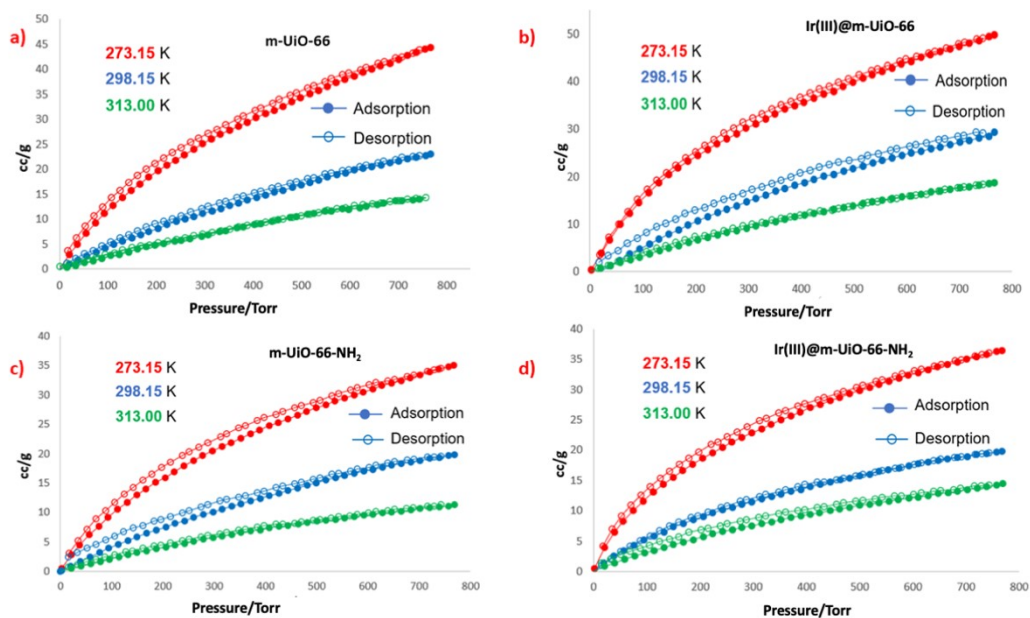

**Figure S5.** CO<sub>2</sub> sorption studies of, (a) m-UiO-66, (b) Ir(III)@m-UiO-66, (c) m-UiO-66-NH<sub>2</sub> and (d) Ir(III)@m-UiO-66-NH<sub>2</sub>.

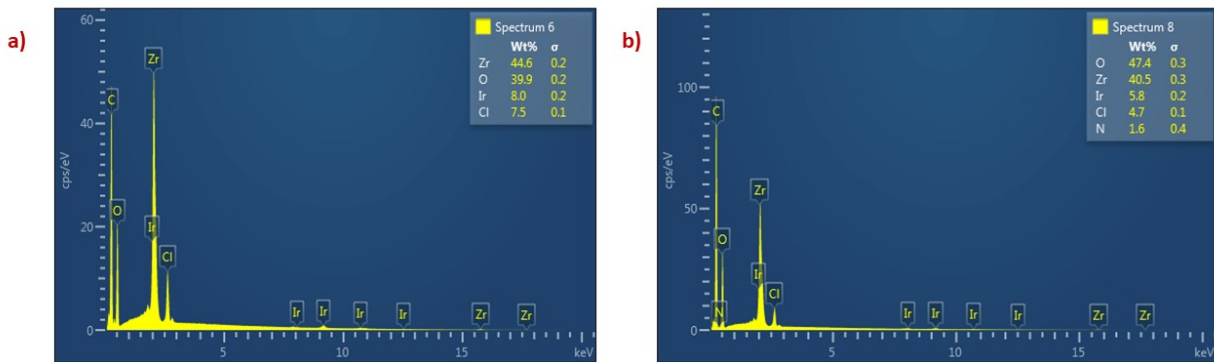

**Figure S6.** EDX spectrum of, (a) Ir(III)@m-UiO-66 and, (b) Ir(III)@m-UiO-66-NH<sub>2</sub>.

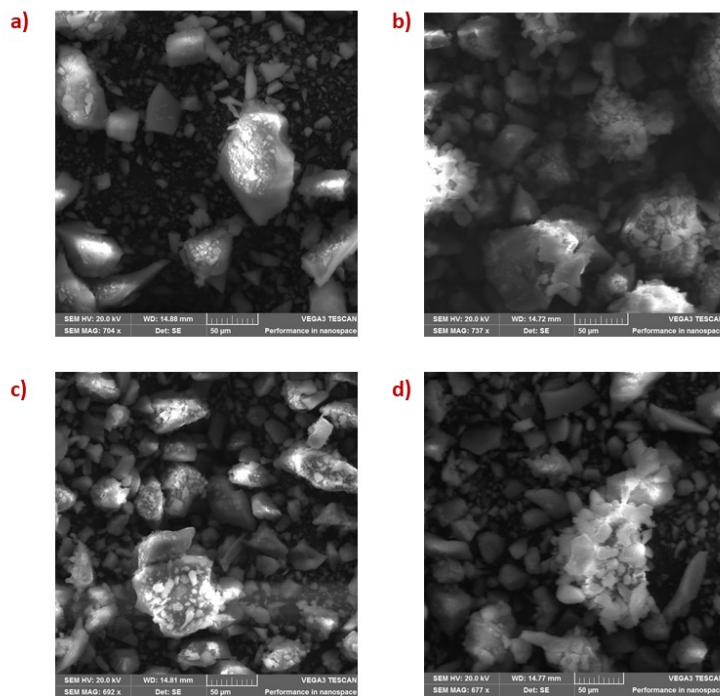

**Figure S7.** SEM images of (a) m-UiO-66, (b) m-UiO-66-NH<sub>2</sub>, (c) Ir(III)@m-UiO-66, and (d) Ir(III)@m-UiO-66-NH<sub>2</sub>.

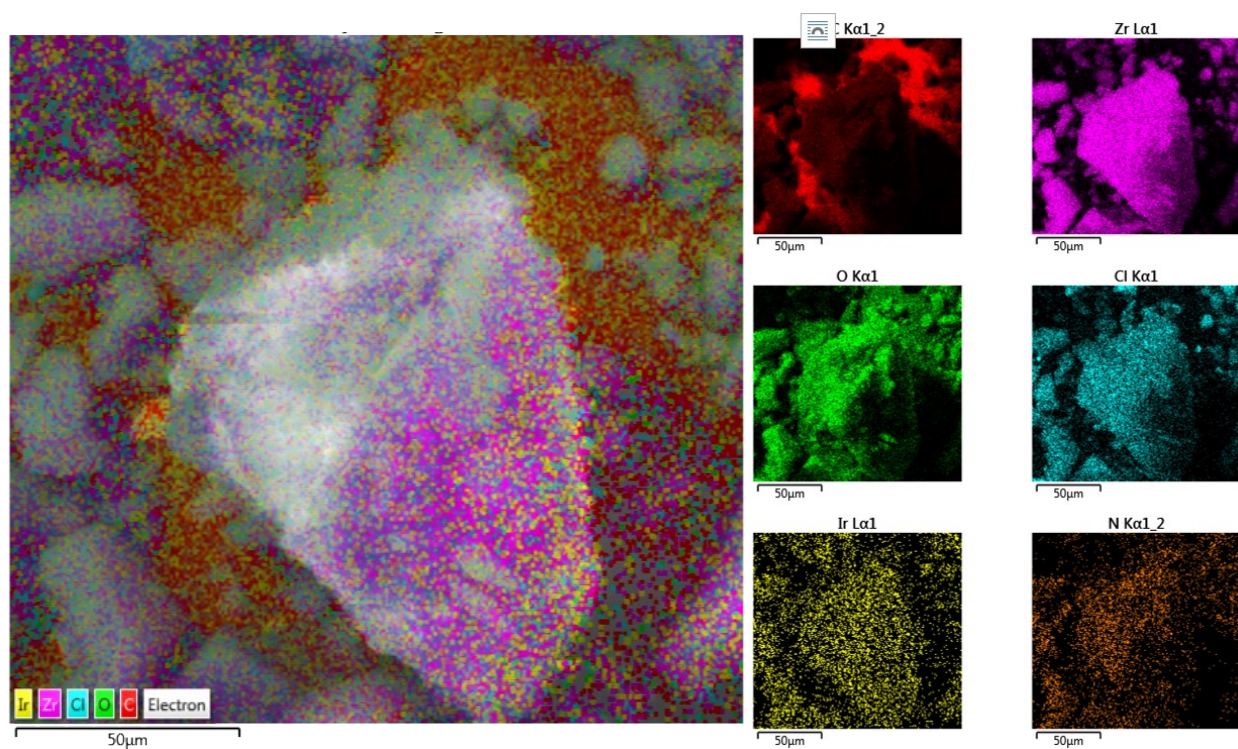

**Figure S8.** Elementary mapping of Ir(III)@m-UiO-66-NH<sub>2</sub>.

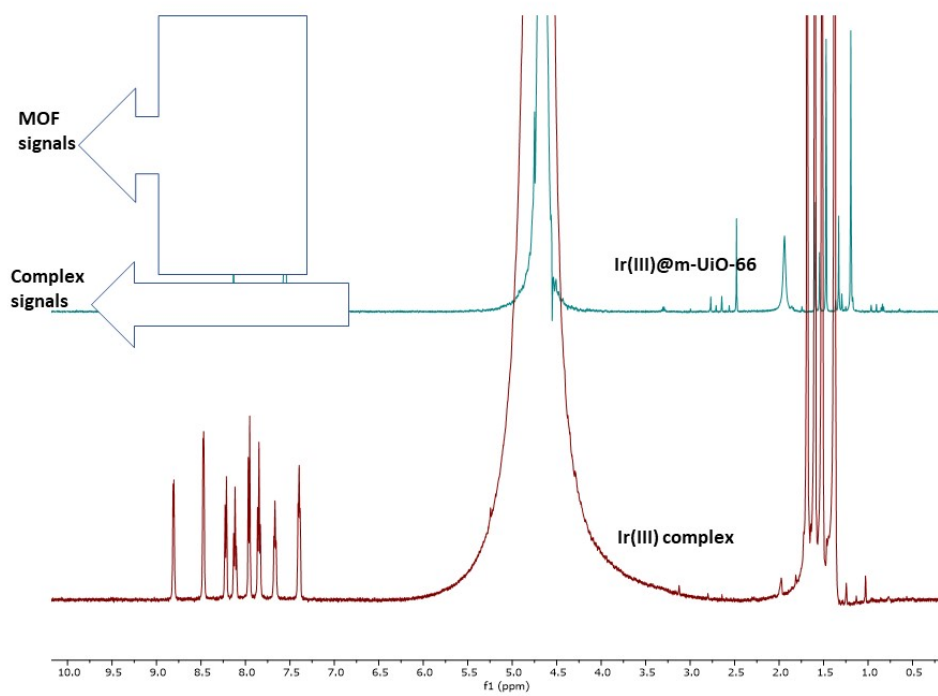

**Figure S9.**  $^1\text{H}$  NMR analysis of Ir(III) complex and Ir(III)@m-Uio-66.

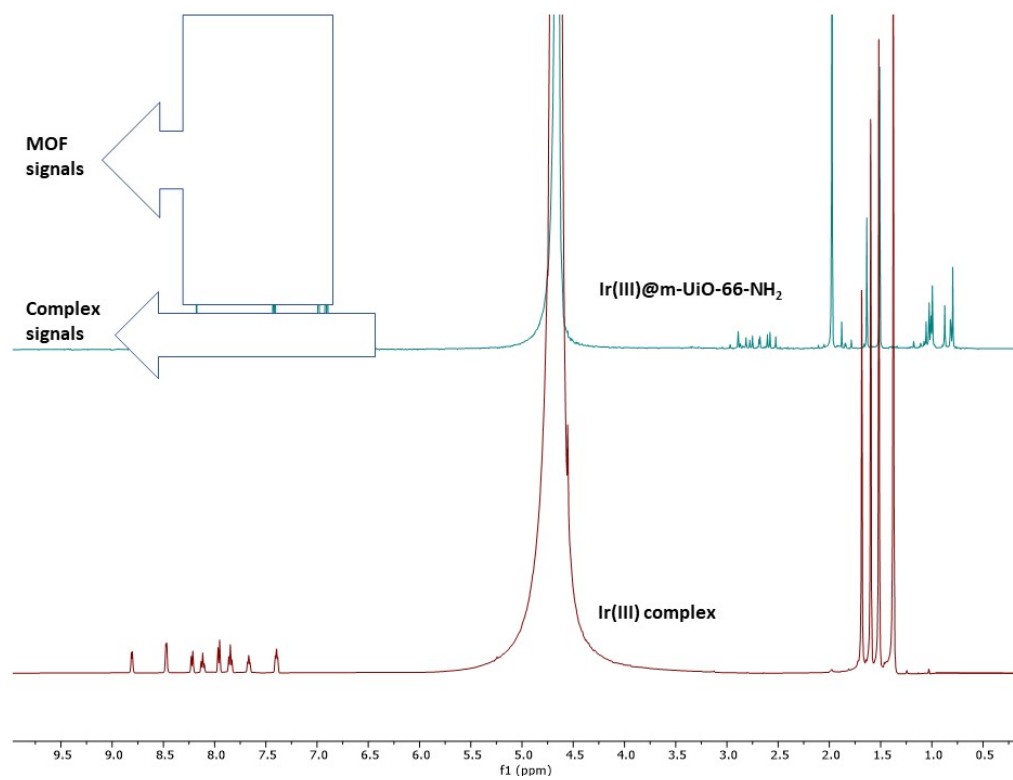

**Figure S10:**  $^1\text{H}$  NMR analysis of  $\text{Ir(III) complex}$  and  $\text{Ir(III)@m-Uio-66-NH}_2$ .



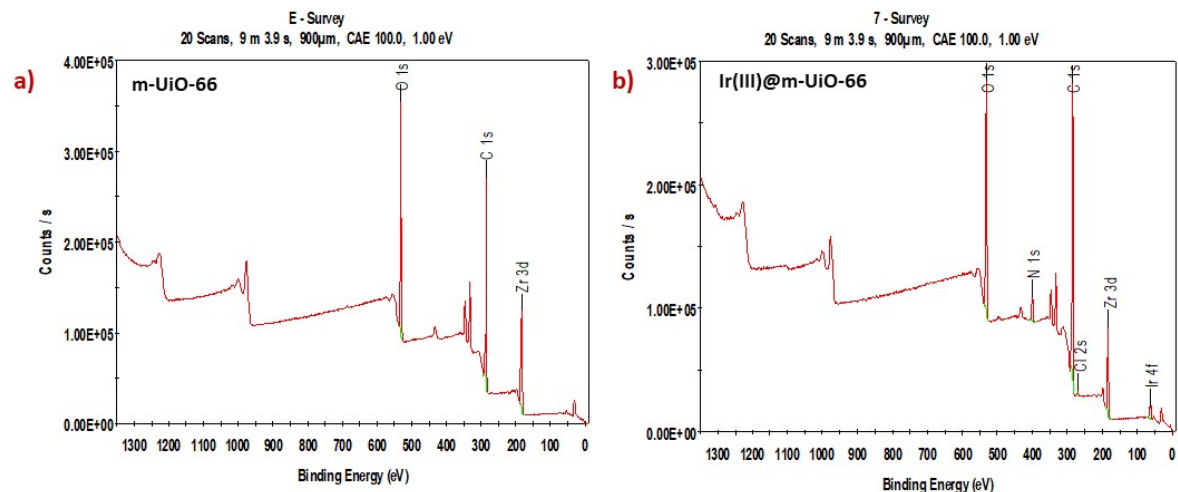

**Figure S11.** XPS spectra of m-UiO-66 and Ir(III)@m-UiO-66.

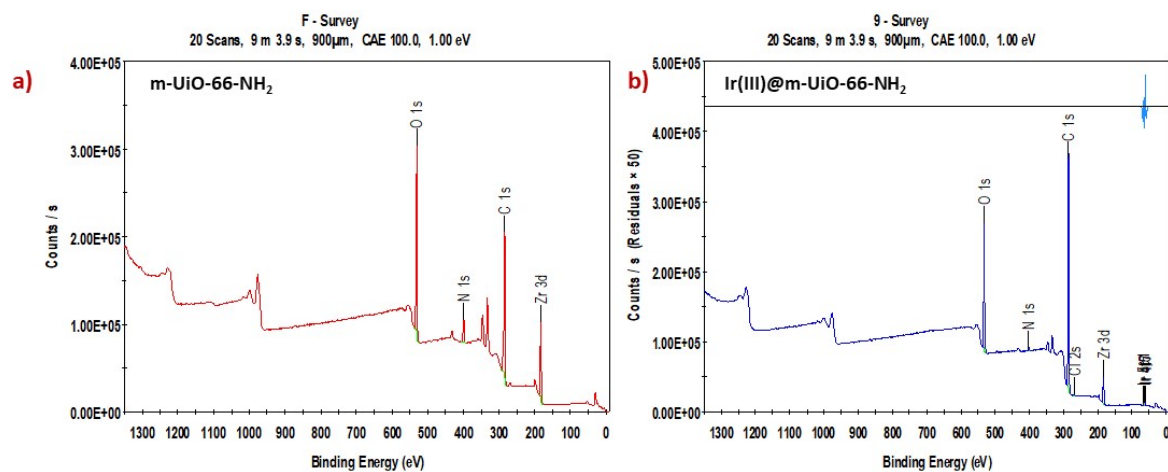

**Figure S12.** XPS spectra of m-UiO-66-NH<sub>2</sub> and Ir(III)@m-UiO-66-NH<sub>2</sub>.

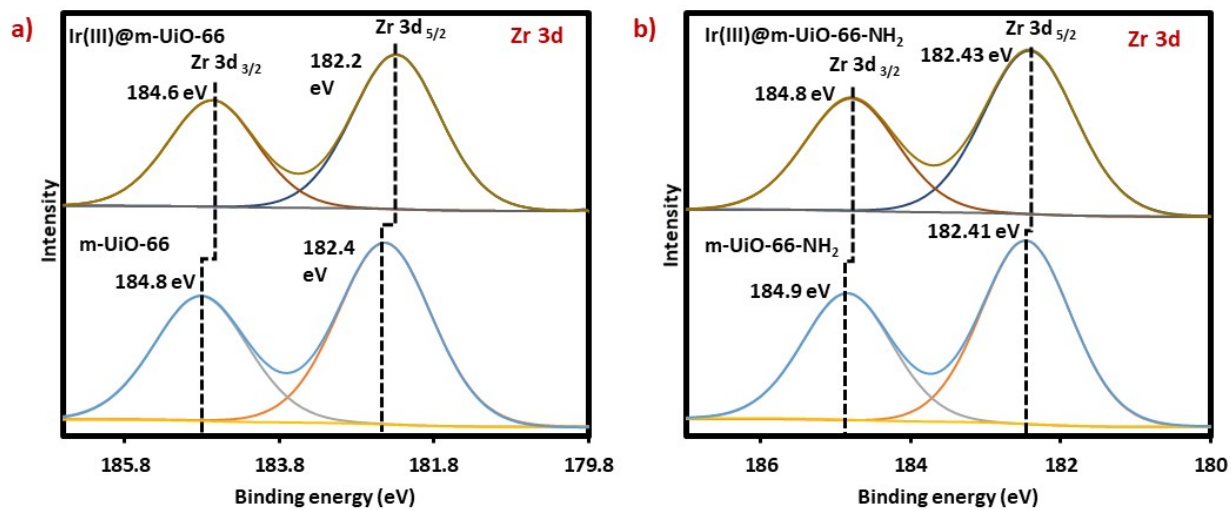

**Figure S13.** XPS analysis of Zr 3d in (a) Ir(III)@m-UiO-66 and (b) Ir(III)@m-UiO-66-NH<sub>2</sub>.

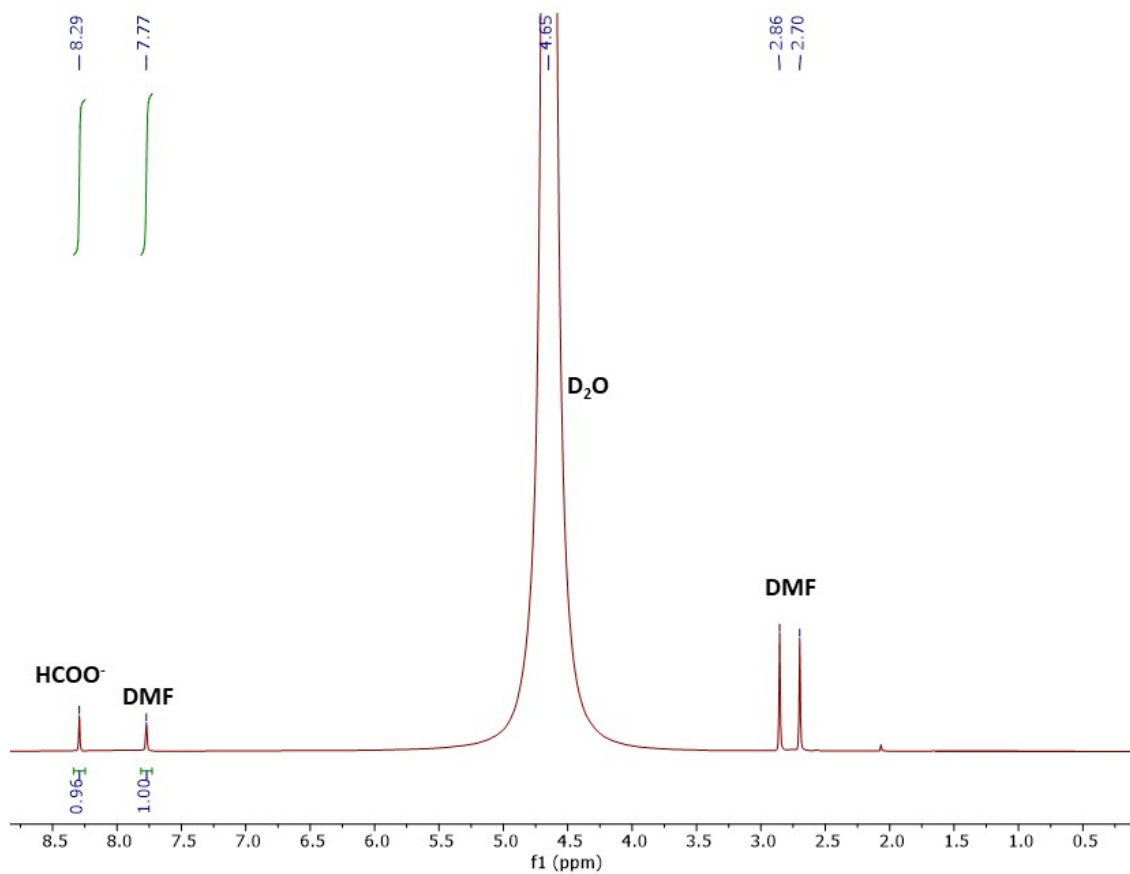

**Figure S14.** <sup>1</sup>H NMR analysis of formate detection and quantification.

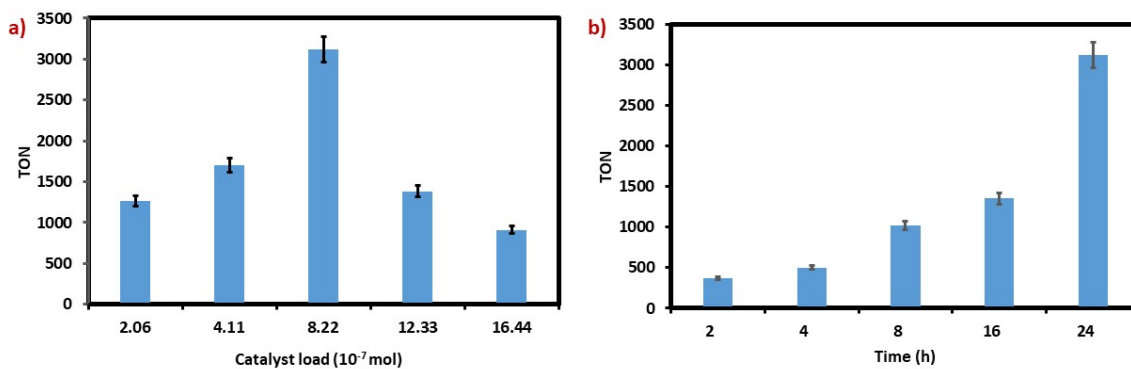

**Figure S15.** Catalysis optimisation studies conditions, 10 mL of water and 3.55 mmol of base (1/4  $\text{H}_2$ : $\text{CO}_2$  total pressure 50 bar), time 24 h, temperature; 140 °C (a) catalyst load studies and, (b) time studies with  $8 \times 10^{-7}$  moles of catalyst.

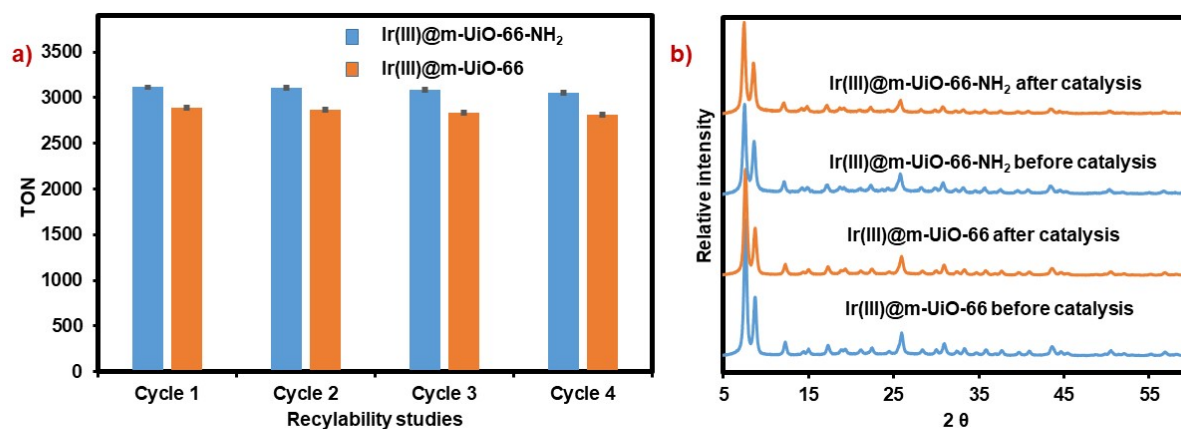

**Figure S16.** (a) Recyclability studies, (b) PXRD of recovered material after catalysis.

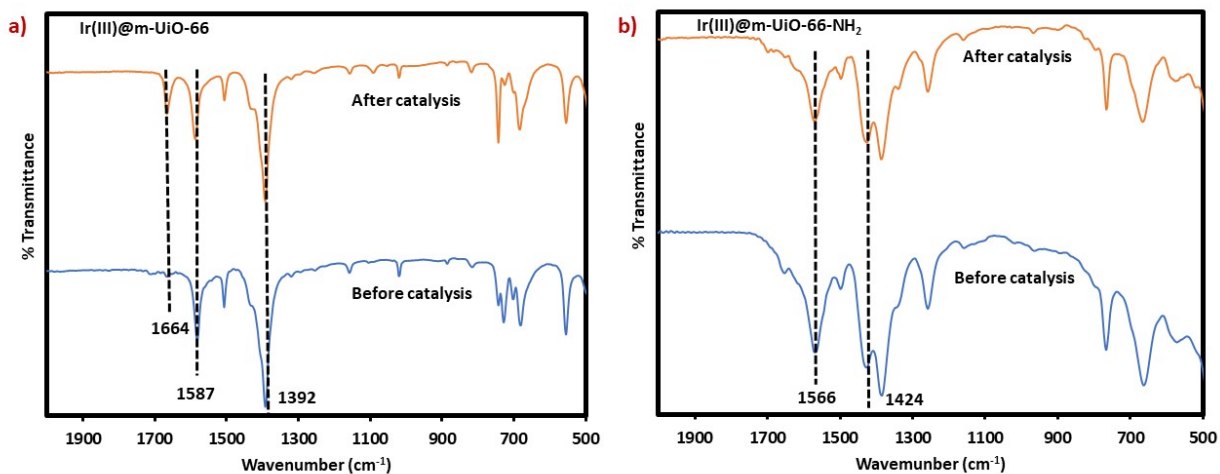

**Figure S17.** FTIR analysis of (a) Ir(III)@m-UiO-66 and (b) Ir(III)@m-UiO-66-NH<sub>2</sub> before and after catalysis.

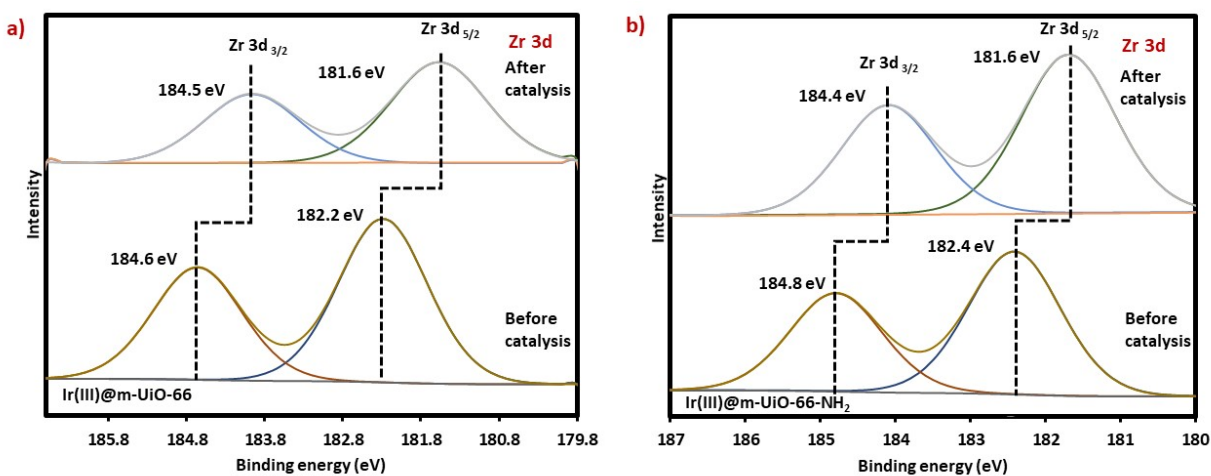

**Figure S18.** XPS analysis of Zr 3d in, (a) Ir(III)@m-UiO-66 and (b) Ir(III)@m-UiO-66-NH<sub>2</sub> before and after catalysis.

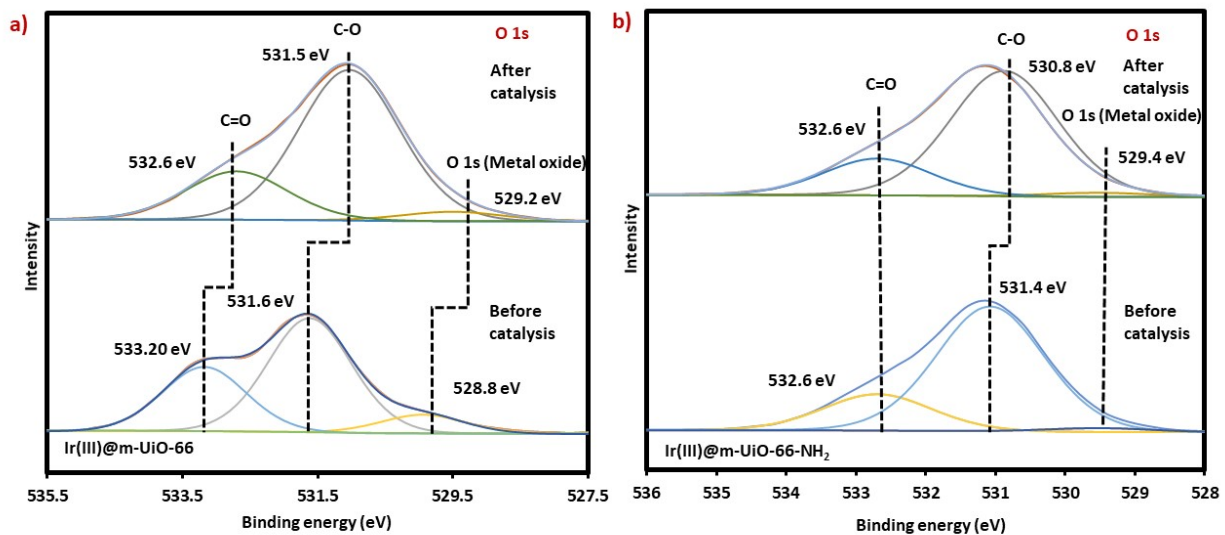

**Figure S19.** XPS analysis of O 1s in, (a) Ir(III)@m-UiO-66 and (b) Ir(III)@m-UiO-66-NH<sub>2</sub> before and after catalysis.

Table S1: Leaching tests for catalysts

| Sample ID                        | % Ir content | % Zr content |
|----------------------------------|--------------|--------------|
| Ir(III)@m-UiO-66                 | 0.0003       | 0.0001       |
| Ir(III)@m-UiO-66-NH <sub>2</sub> | 0.0002       | 0.0001       |
